1 ***Toxoplasma gondii* microneme proteins 1 and 4 bind to Toll-like**  
2 **receptors 2 and 4 N-glycans triggering innate immune response**

3

4 Aline Sardinha-Silva<sup>1</sup>, Flávia C. Mendonça-Natividade<sup>1</sup>, Camila F. Pinzan<sup>1</sup>, Carla D.

5 Lopes<sup>1</sup>, Diego L. Costa<sup>2</sup>, Damien Jacot<sup>3</sup>, Fabricio F. Fernandes<sup>1</sup>, André L. V. Zorzetto-

6 Fernandes<sup>1</sup>, Nicholas J. Gay<sup>4</sup>, Alan Sher<sup>2</sup>, Dragana Jankovic<sup>2</sup>, Dominique Soldati-

7 Favre<sup>3</sup>, Michael E. Grigg<sup>5</sup>, Maria Cristina Roque-Barreira<sup>1\*</sup>

8

9 <sup>1</sup> Department of Cell and Molecular Biology and Pathogenic Bioagents, Ribeirão Preto  
10 Medical School, University of São Paulo- USP (FMRP/USP), Ribeirão Preto, São  
11 Paulo, 14049-900, Brazil

12

13 <sup>2</sup> Immunobiology Section, Laboratory of Parasitic Diseases, National Institute of  
14 Allergy and Infectious Diseases, National Institutes of Health, Bethesda, MD 20892,  
15 USA

16

17 <sup>3</sup> Department of Microbiology and Molecular Medicine, CMU, University of Geneva, 1  
18 rue Michel-Servet, 1211 Geneva 4, Switzerland

19

20 <sup>4</sup> Department of Biochemistry, Cambridge University, 80 Tennis Court Road  
21 Cambridge CB2 1GA, United Kingdom

22

23 <sup>5</sup> Molecular Parasitology Section, Laboratory of Parasitic Diseases, National Institute of  
24 Allergy and Infectious Diseases, National Institutes of Health, Bethesda, MD 20892,  
25 USA

26

27

28 \*Corresponding author:

29 Maria Cristina Roque-Barreira, Phone: +55-16-3315-3062, e-mail:

30 mcrbarre@fmrp.usp.br

31

## 32 **ABSTRACT**

33           The infection of the host cell with *Toxoplasma gondii* involves the regulated  
34 secretion of microneme proteins (TgMICs). The complex formed by TgMIC1/4/6 on the  
35 *T. gondii* surface participates in the adhesion and invasion processes. Here, we show  
36 that TgMIC1- and TgMIC4-stimulated dendritic cells and macrophages produce  
37 proinflammatory cytokines through TLR2 and TLR4 signalling. This process depends  
38 on sugar recognition, since it was shown to be inhibited by point mutations introduced  
39 in the TgMIC1 and TgMIC4 carbohydrate-recognition domains. HEK cells transfected  
40 with TLR2 glycomutants were selectively unresponsive to TgMICs. Following parasite  
41 infection, phagocytes lacking TLR2 and TLR4 failed to generate an early IL-12  
42 response in contrast to wild type cells. Moreover, TgMIC1-KO and TgMIC1/TgMIC4-  
43 DKO parasites stimulated a lower IL-12 response than wild type parasites. Together,  
44 our data reveal that TgMIC1 and TgMIC4 interact physically with TLR2 and TLR4 N-  
45 glycans to trigger an early IL-12 response to *T. gondii*, which may contribute to acute  
46 control of infection.

47

## 48 **AUTHOR SUMMARY**

49           Toxoplasmosis is caused by the protozoan *Toxoplasma gondii*, of the  
50 Apicomplexa phylum. It comprises important parasites able to infect a broad diversity  
51 of animals, including humans. A particularity of *T. gondii* is the ability to invade all  
52 nucleated cells of its hosts through an active process, which depends on the expression  
53 of surface adhesion proteins. These proteins are secreted by specialized organelles  
54 localized in the parasite apical region, such as micronemes. We show, in this study, that  
55 two of the microneme proteins from *T. gondii* play a function that goes beyond the  
56 adhesion activity. These microneme proteins denoted TgMIC1 and TgMIC4 have the

57 ability to recognize sugars. Through this property, they bind to sugars contained in  
58 receptors on mammalian cells surface. This binding starts the process of activation of  
59 innate immune cells and secretion of cytokines, which may act by making more  
60 efficient the host defence mechanisms against the parasite, especially in the beginning  
61 of the infection. It results in an appropriate response because it helps to control the  
62 parasite replication during the acute infection and favours host healthy.

63

## 64 **INTRODUCTION**

65 *Toxoplasma gondii* is a coccidian belonging to the phylum Apicomplexa and the  
66 causative agent of toxoplasmosis. The protozoan infects a variety of vertebrate hosts,  
67 including humans, about one-third of the world population being infected with it [1].  
68 Toxoplasmosis can be fatal in immunocompromised individuals or when contracted  
69 congenitally [1], and is considered the second leading cause of death from foodborne  
70 illnesses in the United States [2].

71 *T. gondii* invades host cells through an active process that relies on the parasite's  
72 actomyosin system, concomitantly with the release of microneme proteins (TgMICs)  
73 and rhoptry proteins (ROPs and RONs) from specialized organelles in the apical region  
74 of the organism [3]. These proteins are secreted by tachyzoites [4, 5] and form  
75 complexes of soluble and transmembrane proteins. Some of the TgMICs act as  
76 adhesins, interacting tightly with host cell-membrane glycoproteins and receptors, and  
77 are involved in the formation of the moving junction [6]. This sequence of events  
78 ensures tachyzoite gliding motility, migration through host cells, and invasion [4, 7].  
79 Among the released proteins, TgMIC1, TgMIC4, and TgMIC6 form a complex that  
80 plays a role in the adhesion and invasion of host cells [8, 9], contributing to the  
81 virulence of the parasite [10, 11].

82           Several studies have shown that host-cell invasion by apicomplexan parasites  
83   such as *T. gondii* involves carbohydrate recognition [12-15]. Interestingly, TgMIC1 and  
84   TgMIC4 have lectin domains [11, 16-18] that recognize oligosaccharides with sialic  
85   acid and D-galactose in the terminal position, respectively. Importantly, the parasite's  
86   Lac<sup>+</sup> subcomplex, consisting of TgMIC1 and TgMIC4, induces adherent spleen cells to  
87   release high levels of IL-12 [17], a cytokine critical for the host's protective response to  
88   *T. gondii* infection [19]. In addition, immunization with this native subcomplex, or with  
89   recombinant TgMIC1 and TgMIC4, protects mice against experimental toxoplasmosis  
90   [20, 21]. The induction of IL-12 is frequently due to the detection of the pathogen by  
91   innate immunity receptors, including members of the Toll-like receptor (TLR) family,  
92   whose stimulation most frequently involves MyD88 activation and leads to the priming  
93   of Th1 response, which protects the host against *T. gondii* [19, 22].

94           Interestingly, the extracellular leucine-rich repeat domains of TLR2 and TLR4  
95   contain four and nine N-glycans, respectively [23]. Therefore, we hypothesized that  
96   TgMIC1 and TgMIC4 could target TLR2 and TLR4 N-glycans on antigen-presenting  
97   cells (APCs) and, through such interaction, trigger cell activation and IL-12 production.  
98   To investigate this possibility, we assayed the ability of recombinant TgMIC1 and  
99   TgMIC4 to bind and activate TLR2 and TLR4. Using several strategies, we  
100   demonstrated that TLR2 and TLR4 are indeed critical targets for both TgMIC1 and  
101   TgMIC4. These parasite and host cell structures establish lectin-carbohydrate  
102   interactions that contribute to the induction of IL-12 production during the early phase  
103   of *T. gondii* infection.

104

105   **RESULTS**

106 **Lectin properties of recombinant TgMIC1 and TgMIC4 are consistent with those**  
107 **of the native Lac<sup>+</sup> subcomplex**

108 Because the native TgMIC1/4 subcomplex purified from soluble *T. gondii*  
109 antigens has lectin properties, we investigated whether their recombinant counterparts  
110 retained the sugar-binding specificity. The glycoarray analysis revealed the interactions  
111 of: i) the Lac<sup>+</sup> subcomplex with glycans containing terminal  $\alpha(2-3)$ -sialyl and  $\beta(1-4)$ - or  
112  $\beta(1-3)$ -galactose; ii) TgMIC1 with  $\alpha(2-3)$ -sialyl residues linked to  $\beta$ -galactosides; and  
113 iii) of TgMIC4 with oligosaccharides with terminal  $\beta(1-4)$ - or  $\beta(1-3)$ -galactose (Fig  
114 1A). The combined specificities of the individual recombinant proteins correspond to  
115 the dual sugar specificity of the Lac<sup>+</sup> fraction, demonstrating that the sugar-recognition  
116 properties of the recombinant proteins are consistent with those of the native ones.

117 Based on the sugar recognition selectivity of TgMIC1 and TgMIC4, we tested  
118 two oligosaccharides ( $\alpha(2-3)$ -sialyllactose and lacto-N-biose) for their ability to inhibit  
119 the interaction of the microneme proteins with the glycoproteins fetuin and asialofetuin  
120 [24]. Sialyllactose inhibited the binding of TgMIC1 to fetuin, and lacto-N-biose  
121 inhibited the binding of TgMIC4 to asialofetuin (Fig 1B). To ratify the carbohydrate  
122 recognition activity of TgMIC1 and TgMIC4, we generated point mutations into the  
123 carbohydrate recognition domains (CRDs) of the TgMICs to abolish their lectin  
124 properties [11, 18, 25]. These mutated forms, i.e. TgMIC1-T126A/T220A and TgMIC4-  
125 K469M, lost the capacity to bind to fetuin and asialofetuin, respectively (Fig 1B),  
126 having absorbance as low as that in the presence of the specific sugars. Thus, our results  
127 indicate that recombinant TgMIC1 and TgMIC4 maintained their lectin properties, and  
128 that the CRD function can be blocked either by competition with specific sugars or by  
129 targeted mutations.

130 **TgMIC1 and TgMIC4 trigger the activation of DCs and macrophages**

131 We have previously demonstrated that the native Lac<sup>+</sup> subcomplex stimulates  
132 murine adherent spleen cells to produce proinflammatory cytokines [20]. We evaluated  
133 whether recombinant TgMIC1 and TgMIC4 retained this property and exerted it on  
134 BMDCs and BMDMs. BMDCs (Figs 2A-D) and BMDMs (Figs 2E-H) produced high  
135 levels of proinflammatory cytokines as IL-12 (Figs 2A and 2E), TNF- $\alpha$  (Figs 2B and  
136 2F), IL-6 (Figs 2C and 2G). Although conventional CD4<sup>+</sup> Th1 cells are known to be the  
137 major producers of IL-10 during murine *T. gondii* infection [26], we found that TgMIC1  
138 and TgMIC4 are able to induce the production of this cytokine by BMDCs (Fig 2D) and  
139 BMDMs (Fig 2H). We verified that the two recombinant proteins induced the  
140 production of similar levels of IL-12, TNF- $\alpha$ , and IL-6 by both BMDCs (Figs 2A-C)  
141 and BMDMs (Figs 2E-G). Both microneme proteins induced the production of similar  
142 levels of IL-10 in BMDCs (Fig 2D); however, BMDMs produced significantly higher  
143 levels of IL-10 when stimulated with TgMIC1 than when stimulated with TgMIC4 (Fig  
144 2H). These cytokine levels were similar to those induced by the TLR4 agonist LPS.  
145 Thus, recombinant TgMIC1 and TgMIC4 induce a proinflammatory response in innate  
146 immune cells, which is consistent with the results obtained for the native Lac<sup>+</sup>  
147 subcomplex [20]. LPS contamination of samples was avoided as described in the  
148 Material and Methods section.

#### 149 **The activation of macrophages by TgMIC1 and TgMIC4 depends on TLR2 and** 150 **TLR4**

151 To investigate the mechanisms through which TgMIC1 and TgMIC4 stimulate  
152 innate immune cells to produce cytokines, we assessed whether these microneme  
153 proteins can activate specific TLRs. To this end, BMDMs from WT, MyD88<sup>-/-</sup>, TRIF<sup>-/-</sup>,  
154 TLR2<sup>-/-</sup>, TLR4<sup>-/-</sup>, or TLR2<sup>-/-</sup>/TLR4<sup>-/-</sup> (DKO) mice, as well as HEK293T cells transfected  
155 with TLR2 or TLR4, were cultured in the presence or absence of recombinant TgMIC1

156 and TgMIC4 for 48 hours. The production of IL-12 by BMDMs (Figs 3A-I) and IL-8 by  
157 HEK cells (Figs 3J and 3K) were used as an indicator of cell activation. IL-12  
158 production by BMDMs from MyD88<sup>-/-</sup>, TRIF<sup>-/-</sup>, TLR2<sup>-/-</sup>, and TLR4<sup>-/-</sup> mice was lower  
159 than that of BMDMs from WT mice (Figs 3A-D); no IL-12 was detected in cultures of  
160 DKO mice cells stimulated with either TgMIC1 or TgMIC4 (Fig 3E). These results  
161 show that TLR2 and TLR4 are both relevant for the activation of macrophages induced  
162 by TgMIC1 and TgMIC4. The residual cytokine production observed in macrophages  
163 from TLR2<sup>-/-</sup> or MyD88<sup>-/-</sup> mice may result from the activation of TLR4 (Figs 3A and  
164 3C), and vice versa; e.g., the residual IL-12 levels produced by macrophages from  
165 TLR4<sup>-/-</sup> mice may result from TLR2 activation. The finding that microneme proteins fail  
166 to induce IL-12 production in DKO mice BMDMs suggests that cell activation triggered  
167 by TgMIC1 or TgMIC4 does not require the participation of other innate immunity  
168 receptors beyond TLR2 and TLR4. Nevertheless, since TLR9, TLR11, and TLR12  
169 account for the production of IL-12 by macrophages stimulated with parasite  
170 components such as DNA or profilin [19, 22, 27], we investigated the involvement of  
171 these receptors, as well as TLR3 and TLR5, in the response to TgMIC1 or TgMIC4.  
172 BMDMs from TLR3<sup>-/-</sup>, TLR5<sup>-/-</sup>, TLR9<sup>-/-</sup>, and TLR11<sup>-/-</sup>/TLR12<sup>-/-</sup> mice stimulated with  
173 TgMIC1 or TgMIC4 produced similar levels of IL-12 as cells from WT (Figs 3F-I),  
174 indicating that the activation triggered by TgMIC1 or TgMIC4 does not depend on these  
175 receptors. Additionally, stimulation of HEK cells transfected with human TLR2 (Fig 3J)  
176 or TLR4 (Fig 3K) with optimal concentrations of TgMIC1 (S1A and S1C Figs) and  
177 TgMIC4 (S1B and S1D Figs) induced IL-8 production at levels that were higher than  
178 those detected in the absence of stimuli (medium), and similar to those induced by the  
179 positive controls. Finally, by means of a pull-down experiment, we demonstrated the

180 occurrence of physical interaction of TgMIC1 with TLR2 or TLR4 and TgMIC4 with  
181 TLR2 or TLR4 (Fig 3L).

182 **Cell activation induced by TgMIC1 and TgMIC4 results from the interaction of**  
183 **their CRDs with TLR2 and TLR4 N-glycans**

184 We hypothesized that in order to trigger cell activation, TgMIC1 and TgMIC4  
185 CRDs target oligosaccharides of the ectodomains of TLR2 (four N-linked glycans) [23]  
186 and TLR4 (nine N-linked glycans) [28]. This hypothesis was tested by stimulating  
187 BMDCs (Fig 4A) and BMDMs (Fig 4B) from WT mice with intact TgMIC1 and  
188 TgMIC4 or with the mutated forms of these microneme proteins, namely TgMIC1-  
189 T126A/T220A and TgMIC4-K469M, which lack carbohydrate binding activity [11, 18,  
190 25]. IL-12 levels in culture supernatants were lower upon stimulation with TgMIC1-  
191 T126A/T220A or TgMIC4-K469M, showing that induction of cell activation requires  
192 intact TgMIC1 and TgMIC4 CRDs. The same microneme proteins were used to  
193 stimulate TLR2-transfected HEK293T cells (Fig 4C), and, similarly, lower IL-8  
194 production was obtained in response to mutated TgMIC1 or TgMIC4 compared to that  
195 seen in response to intact proteins. These observations demonstrated that TgMIC1 and  
196 TgMIC4 CRDs are also necessary for inducing HEK cell activation.

197 We used an additional strategy to examine the ability of TgMIC1 and TgMIC4  
198 to bind to TLR2 N-glycans. In this approach, HEK cells transfected with the fully N-  
199 glycosylated TLR2 ectodomain or with the TLR2 glycomutants [23] were stimulated  
200 with a control agonist (FSL-1) or with TgMIC1 or TgMIC4. HEK cells transfected with  
201 any TLR2 form, except those expressing totally unglycosylated TLR2 (mutant  $\Delta$ -  
202 1,2,3,4), were able to respond to FSL-1 (Fig 4D), a finding that is consistent with the  
203 previous report that the  $\Delta$ -1,2,3,4 mutant is not secreted by HEK293T cells [23]. Cells  
204 transfected with TLR2 lacking only the first N-glycan (mutant  $\Delta$ -1) responded to all



205 stimuli. The response to the TgMIC1 stimulus was significantly reduced in cells  
206 transfected with five different TLR2 mutants, lacking the second, third, and fourth N-  
207 glycans (Fig 4D). Moreover, TgMIC4 stimulated IL-8 production was significantly  
208 reduced in cells transfected with the mutants lacking only the third N-glycan (Fig 4D).

209 These results indicate that TgMIC1 and TgMIC4 use their CRDs to induce  
210 TLR2- and TLR4-mediated cell activation. Among the TLR2 N-glycans, the TgMIC1  
211 CRD likely targets the second, third, and the fourth glycan, while the TgMIC4 CRD is  
212 targets only the third.

### 213 **The early activation of *T. gondii*-infected DCs depends on TLR2- and TLR4-** 214 **mediated pathways**

215 We investigated the biological relevance of the TLR2- and TLR4-mediated  
216 activation of innate immune cells during a *T. gondii* infection of DCs. Twenty-four  
217 hours after infection with WT tachyzoites of the RH strain, BMDCs from WT mice  
218 produced IL-12 levels that were as high as those induced by LPS or STAg, which were  
219 used as positive controls. Consistent with previous studies, BMDCs from MyD88<sup>-/-</sup>  
220 mice produced nearly 80% less IL-12 (Fig 5A). We then performed additional  
221 experiments in which BMDCs derived from WT or TLR2<sup>-/-</sup>/TLR4<sup>-/-</sup> DKO mice were  
222 infected with *T. gondii*, and the kinetics of IL-12 production was evaluated. Lower  
223 levels of IL-12 were detected in the supernatants of DKO BMDCs at 6–24 h after  
224 infection than in those of WT cells. At 48 h after the infection, IL-12 levels were similar  
225 in both DKO and WT cells (Fig 5B). Our findings therefore indicated that TLR2 and  
226 TLR4 activation is required for the early induction of IL-12 production by DCs  
227 following *T. gondii* infection.

### 228 **The early activation of *T. gondii*-infected innate immune cells is primarily** 229 **triggered by TgMIC1**

230           Because early IL-12 production by innate immune cells is induced by both *T.*  
231 *gondii* infection and stimulation with TgMICs, we investigated whether such production  
232 would be impaired in cells infected with *T. gondii* lacking TgMIC1 and/or TgMIC4.  
233 The assays were conducted by using TgMIC1 or TgMIC4 single-knockout parasites [8]  
234 and TgMIC1/TgMIC4 double knockout parasites. We generated the DKO strain from  
235 TgMIC1-KO parasites, which had the *TgMIC4* gene disrupted by the insertion of a  
236 chloramphenicol (cat) cassette with flanking regions of the endogenous *TgMIC4* locus  
237 (Fig 6A). After transfection and clone selection, we confirmed that the *TgMIC4* gene  
238 was absent in TgMIC1/TgMIC4-DKO parasites (Fig 6B) and there was no TgMIC4  
239 protein expression (Fig 6C).

240           For the infection, we compared the kinetics of IL-12 production following the  
241 infection of BMDMs and BMDCs with WT, TgMIC1-KO, TgMIC4-KO, or  
242 TgMIC1/TgMIC4 DKO parasites, all derived from the RH strain. We found that the  
243 infection with the WT strain led to early IL-12 production (within 6 h) in BMDCs, but  
244 not in BMDMs. The levels of IL-12 produced by BMDCs (Figs 6D-F) were sustained  
245 when cells were infected with TgMIC4-KO parasites, but decreased significantly when  
246 infected with TgMIC1-KO or DKO parasites. Notably, during the first 12 h after  
247 infection, the levels of IL-12 were significantly lower and comparable to those in the  
248 negative controls (non-infected cells). At 24 and 48 h post-infection, the IL-12 levels  
249 were restored by 61.3–78.25%, but were still lower than those induced by the infection  
250 with WT parasites. A significant increase in IL-12 production by BMDMs after  
251 infection with WT parasites (Figs 6G-I), compared to non-infected cells, was detected  
252 only 24 h post infection. However, similar to that observed in BMDCs, infection with  
253 TgMIC1-KO and TgMIC1/TgMIC4 DKO parasites resulted in lower IL-12 production  
254 compared to the infection with WT parasites. The kinetics IL-12 production by BMDC

255 in response to infection with WT or with transformed *T. gondii* suggests that TgMIC1 is  
256 crucial for stimulating the response of DCs in the early phases of *T. gondii* infection. In  
257 later time points, other *T. gondii* components would act as IL-12 inducers, such as  
258 profilin, which is a TLR11 and TLR12 agonist [27, 29], or GRA7 [30], GRA15 [31],  
259 and GRA24 [32], which directly triggers intracellular signalling pathways in a TLR-  
260 independent manner.

261

## 262 **DISCUSSION**

263 In this study, we report a new function for TgMIC1 and TgMIC4, two *T. gondii*  
264 microneme proteins involved in the host-parasite relationship. We show that TgMIC1  
265 and TgMIC4, by interacting with N-glycans of TLR2 and TLR4, trigger the activation  
266 of innate immunity cells. This results in IL-12 secretion, known to lead to the  
267 production of IFN- $\gamma$ , a cytokine responsible for parasite clearance and development of a  
268 protective T cell response by the host [19, 22]. This set of events explains, at least in  
269 part, the resistance conferred by TgMIC1 and TgMIC4 administration against  
270 experimental toxoplasmosis [20, 21].

271 *T. gondii* tachyzoites express microneme proteins either on their surface, as  
272 transmembrane proteins, or secrete them in their soluble form. These proteins may form  
273 complexes, such as those of TgMIC1, TgMIC4, and TgMIC6 (TgMIC1/4/6), in which  
274 TgMIC6 is a transmembrane protein that anchors the two soluble molecules TgMIC1  
275 and TgMIC4 [8]. Genetic disruption of any of the three encoding genes does not  
276 interfere with parasite survival [8] nor its interaction with and attachment to the host  
277 cells [10]; however, TgMIC1 has been demonstrated to play a role in invasion and  
278 contribute to virulence in mice [10]. We previously isolated soluble TgMIC1/4, a  
279 lactose-binding complex from soluble *T. gondii* antigens (STAg) [17], and its lectin

280 activity was confirmed by the fact that TgMIC1 binds to sialic acid [9] and TgMIC4 to  
281  $\beta$ -galactose [18]. We also reported that TgMIC1/4 stimulates adherent splenic murine  
282 cells to produce IL-12 at levels as high as those induced by STAg [20]. The hypothesis  
283 that this result from interactions of microneme protein(s) with defined glycosylated  
284 receptor(s) expressed on the host cell surface was confirmed in the present study.

285 To make this analysis possible, we generated recombinant forms of TgMIC1 and  
286 TgMIC4, which retain their specific sialic acid- and  $\beta$ -galactose-binding properties  
287 conserved, as indicated by the results of their binding to fetuin and asialofetuin as well  
288 as the glycoarray assay. Both recombinant TgMIC1 and TgMIC4 triggered the  
289 production of proinflammatory and anti-inflammatory cytokines in DCs and  
290 macrophages via the recognition of TLR2 and TLR4 N-glycans, as well as by signalling  
291 through MyD88 and, partially, TRIF. Importantly, our results demonstrate that the  
292 binding of TgMIC1 and TgMIC4 to selected N-glycans in the structures of TLR2 and  
293 TLR4 induces cell activation. We further proposed that cell activation occurred due to  
294 TgMIC1 and TgMIC4 targeting N-glycans of both TLR2 and TLR4. The ligands for  
295 TgMIC1 and TgMIC4,  $\alpha$ 2-3-sialyllactosamine and  $\beta$ 1-3- or  $\beta$ 1-4-galactosamine,  
296 respectively, are very often terminal residues of mammalian N-glycans attached to  
297 numerous glycoconjugates on the surface of cells. Such interactions account mostly for  
298 the adhesion and invasion of host cells by the parasite, thus making these proteins  
299 important candidate *T. gondii* virulence factors [10]. However, as already mentioned,  
300 TgMIC1 and TgMIC4 target N-glycans on the ectodomains of TLR2 and TLR4, the  
301 established interactions culminate in an immunostimulatory effect, which limits parasite  
302 survival. In this sense, TgMIC1 and TgMIC4 may work as double-edged swords during  
303 *T. gondii* infection.

304           Several pathogens are known to synthesize lectins, which are most frequently  
305 reported to interact with glycoconjugates on host cells to promote adherence, invasion,  
306 and colonization of tissues [33-36]. Nonetheless, there are currently only a few  
307 examples of lectins from pathogens that recognize sugar moieties present in TLRs and  
308 induce IL-12 production by innate immunity cells. Paracoccin, a GlcNAc-binding lectin  
309 from the human pathogen *Paracoccidioides brasiliensis*, induces macrophage  
310 polarization towards the M1 phenotype [37] and the production of inflammatory  
311 cytokines through the interaction with TLR2 N-glycans [38]. Furthermore, the  
312 galactose-adherence lectin from *Entamoeba histolytica* activates TLR2 and induces IL-  
313 12 production [39]. In addition, the mammalian soluble lectin SP-A, found in lung  
314 alveoli, interacts with the TLR2 ectodomain [40]. The occurrence of cell activation and  
315 IL-12 production as a consequence of the recognition of TLR N-glycans has also been  
316 demonstrated by using plant lectins with different sugar-binding specificities [41, 42].

317           The binding of TgMIC1 and TgMIC4, as well as the lectins above, to TLR2 and  
318 TLR4 may be associated with the position of the specific sugar residue present on the  
319 receptor's N-glycan structure. Since the N-glycan structures of TLR2 and TLR4 are still  
320 unknown, we assume that the targeted TgMIC1 and TgMIC4 residues, e.g. sialic acid  
321  $\alpha$ 2-3-linked to galactose  $\beta$ 1-3- and  $\beta$ 1-4-galactosamines, are appropriately placed in the  
322 receptors' oligosaccharides to allow the recognition phenomenon and trigger the  
323 activation of innate immune responses.

324           Several *T. gondii* components were shown to activate innate immune cells in a  
325 TLR-dependent manner, but independently of sugar recognition. This is the case for  
326 profilin (TgPRF), which is essential for the parasite's gliding motility based on actin  
327 polymerization; it is recognized by TLR11 [27] and TLR12 [29, 43]. In addition, *T.*  
328 *gondii*-derived glycosylphosphatidylinositol anchors activate TLR2 and TLR4 [44], and

329 parasite RNA and DNA were shown to be the ligands for TLR7 and TLR9, respectively  
330 [19, 22, 43]. The stimulation of all of these TLRs culminates in MyD88 activation and  
331 results in IL-12 production [19, 22]. Several other *T. gondii* components induce the  
332 production of proinflammatory cytokines such as IL-12, independent of TLRs. For  
333 example, the dense granule protein 7 (GRA7) induces MyD88-dependent NF- $\kappa$ B  
334 activation, which is followed by IL-12, TNF- $\alpha$ , and IL-6 production [30]. In addition,  
335 GRA15 activates NF- $\kappa$ B, promoting the release of IL-12 [31], and GRA24 triggers the  
336 autophosphorylation of p38 MAP kinase, which culminates in proinflammatory  
337 cytokine and chemokine secretion [32]. Furthermore, MIC3 was described to induce a  
338 TNF- $\alpha$  secretory response and macrophage M1 polarization [45]. Thus, several *T.*  
339 *gondii* components, including TgMIC1 and TgMIC4, can favour protective immunity to  
340 the parasite by inducing the production of proinflammatory cytokines, which are known  
341 to control the pathogen's replication during the acute phase of infection and favour the  
342 development of a Th1 adaptive response [19].

343 Our results regarding soluble TgMIC1 and TgMIC4 confirmed our hypothesis  
344 that they are associated with the induction of the innate immune response against *T.*  
345 *gondii* through TLR2- and TLR4-dependent pathways. We demonstrated that, during  
346 the first 24 h of infection, IL-12 production by DCs is dependent on TLR2 and TLR4  
347 activation. This is consistent with previous studies that highlight the importance of TLR  
348 signalling pathways, as well as the MyD88 adapter molecule, as essential for conferring  
349 resistance to *T. gondii* infection [27, 44, 46, 47].

350 Finally, our results suggest that TgMIC1, in particular, contributes to the  
351 secretion of IL-12 by macrophages and DCs during the first 48 h of infection. More  
352 specifically, TgMIC1 seemed to be exclusively responsible for IL-12 production during  
353 the first 12 h of infection, since DCs infected with TgMIC1-KO parasites did not

354 produce IL-12 during this period. The same activation pattern was generated by  
355 TgMIC1/TgMIC4 DKO tachyzoites. Although we did not detect active participation of  
356 TgMIC4 in the activation of infected innate immune cells, we still speculate that it  
357 contributes to the induction of IL-12 production during *T. gondii* infection. We have  
358 clearly demonstrated this property of TgMIC4 when performing *in vitro* assays with  
359 recombinant TgMIC4, which induced IL-12 production by APCs. We did not observe a  
360 decrease in IL-12 production when APCs were infected with TgMIC4-KO parasites  
361 probably because TgMIC1 is still expressed and properly targeted in the absence of  
362 TgMIC4. Therefore, TgMIC1 expression alone appears to be sufficient to induce IL-12  
363 secretion by APCs. On the other hand, TgMIC4 and TgMIC6 rely on the expression of  
364 TgMIC1 to be transported through the secretory pathway, to the micronemes and,  
365 consequently, to the protozoan's cell surface [8, 18]. Thus, in TgMIC1-KO parasites,  
366 the TgMIC4 and TgMIC6 proteins remain inside intracellular compartments such as the  
367 endoplasmic reticulum and Golgi apparatus. The subsequent reintroduction of TgMIC1  
368 expression in knockout parasites restored the transport of TgMIC4 and TgMIC6 to the  
369 cell surface[8]. Marchant and collaborators [18] have proposed a model that explains  
370 the expression and secretion of TgMIC1 and TgMIC4 in *T. gondii*: TgMIC1 forms a  
371 disulphide-linked trimer, and each TgMIC1 monomer engages a TgMIC4 monomer  
372 through its  $\beta$ -finger motif, creating a heterohexamer [15]. According to this model and  
373 previous studies on the issue, the interaction between TgMIC1 and TgMIC4 is required  
374 for TgMIC4 to correctly target micronemes [8, 48]. These data indicate that TgMIC1-  
375 KO parasites do not secrete TgMIC4, while TgMIC4-KO parasites do secrete TgMIC1.  
376 By analysing the infection of DCs and macrophages by TgMIC4-KO parasites, we  
377 observed that early IL-12 production is stimulated by TgMIC1 in compensation for the  
378 absence of TgMIC4. Infection with TgMIC1-KO tachyzoites yielded results that were

379 similar to those obtained using DKO parasites, because TgMIC1 and TgMIC4 are not  
380 expressed on the surface of *T. gondii* nor secreted by TgMIC1-KO or DKO strains.

381 Our findings demonstrate, for the first time, the importance of the recognition of  
382 the host's carbohydrates by *T. gondii* lectins, namely the interaction of TgMIC1 and  
383 TgMIC4 with carbohydrates of TLR2 and TLR4, which triggers protective innate  
384 immune cytokine in vitro. Studies are in progress to test the role of this novel  
385 recognition pathway in the control of acute infection in vivo. If confirmed, the parasite  
386 lectin-host TLR interactions described here could serve as potential targets for  
387 therapeutic intervention strategies against toxoplasmosis.

388

## 389 **METHODS**

### 390 **Ethics statement**

391 All experiments were conducted in accordance to the Brazilian Federal Law  
392 11,794/2008 establishing procedures for the scientific use of animals, and State Law  
393 establishing the Animal Protection Code of the State of Sao Paulo. All efforts were  
394 made to minimize suffering, and the animal experiments were approved by the Ethics  
395 Committee on Animal Experimentation (*Comissão de Ética em Experimentação Animal*  
396 - CETEA) of the Ribeirao Preto Medical School, University of Sao Paulo (protocol  
397 number 065/2012), following the guidelines of the National Council for Control of  
398 Animal Experimentation (*Conselho Nacional de Controle de Experimentação Animal* -  
399 CONCEA).

### 400 **Lac<sup>+</sup> fraction and recombinant TgMIC1 and TgMIC4**

401 The lactose-eluted (Lac<sup>+</sup>) fraction was obtained as previously reported [17, 21].  
402 Briefly, the total soluble tachyzoite antigen (STAg) fraction was loaded into a lactose  
403 column (Sigma-Aldrich, St. Louis, MO) and equilibrated with PBS containing 0.5 M



404 NaCl. The material adsorbed to the resin was eluted with 0.1 M lactose in equilibrating  
405 buffer and dialyzed against ultrapure water. The obtained fraction was denoted as Lac<sup>+</sup>  
406 and confirmed to contain TgMIC1 and TgMIC4. For the recombinant proteins, TgMIC1  
407 and TgMIC4 sequences were amplified from cDNA of the *T. gondii* strain ME49 with a  
408 6-histidine tag added on the N-terminal, cloned into pDEST17 vector (Gateway  
409 Cloning, Thermo Fisher Scientific Inc., Grand Island, NY), and used to transform DH5 $\alpha$   
410 *E. coli* chemically competent cells for ampicillin expression selection, as described  
411 before [21]. The plasmids with TgMIC1-T126A/T220A and TgMIC4-K469M were  
412 synthesized by GenScript (China) using a pET28a vector, and the TgMIC sequences  
413 carrying the mutations were cloned between the *Nde*I and *Bam*H I sites. All plasmids  
414 extracted from DH5 $\alpha$  *E. coli* were transformed in *E. coli* BL21-DE3 chemically  
415 competent cells to produce recombinant proteins that were then purified from inclusion  
416 bodies and refolded by gradient dialysis, as described previously [21]. Endotoxin  
417 concentrations were measured in all proteins samples using the Limulus Amebocyte  
418 Lysate Kit – QCL-1000 (Lonza, Basel, Switzerland). The TgMIC1, TgMIC1-  
419 T126A/T220A, TgMIC4 and TgMIC4-K469M contained 7.2, 3.2, 3.5 and 1.1 EU  
420 endotoxin/ $\mu$ g of protein, respectively. Endotoxin was removed by passing over two  
421 polymyxin-B columns (Affi-Prep® Polymyxin Resin; Bio-Rad, Hercules, CA).  
422 Additionally, prior to all *in vitro* cell-stimulation assays, the proteins samples were  
423 incubated with 50  $\mu$ g/mL of polymyxin B sulphate salt (Sigma-Aldrich, St. Louis, MO)  
424 for 30 min at 37 °C to remove possible residual LPS.

#### 425 **Glycan array**

426 The carbohydrate-binding profile of microneme proteins was determined by  
427 Core H (Consortium for Functional Glycomics, Emory University, Atlanta, GA), using  
428 a printed glycan microarray, as described previously [49]. Briefly, TgMIC1-Fc,

429 TgMIC4-Fc, and Lac<sup>+</sup>-Fc in binding buffer (1% BSA, 150 mM NaCl, 2 mM CaCl<sub>2</sub>, 2  
430 mM MgCl<sub>2</sub>, 0.05% (w/v) Tween 20, and 20 mM Tris-HCl, pH 7.4) were applied onto a  
431 covalently printed glycan array and incubated for 1 h at 25 °C, followed by incubation  
432 with Alexa Fluor 488-conjugate (Invitrogen, Thermo Fisher Scientific Inc., Grand  
433 Island, NY). Slides were scanned, and the average signal intensity was calculated. The  
434 common features of glycans with stronger binding are depicted in Fig. 1a. The average  
435 signal intensity detected for all of the glycans was calculated and set as the baseline.

#### 436 **Sugar-inhibition assay**

437 Ninety-six-well microplates were coated with 1 µg/well of fetuin or asialofetuin,  
438 glycoproteins diluted in 50 µL of carbonate buffer (pH 9.6) per well, followed by  
439 overnight incubation at 4 °C. TgMIC1 or TgMIC4 proteins (both wild type (WT) and  
440 mutated forms), previously incubated or not with their corresponding sugars, i.e. α(2-3)-  
441 sialyllactose for TgMIC1 and lacto-N-biose for TgMIC4 (V-lab, Dextra, LA, UK), were  
442 added into coated wells and incubated for 2 h at 25 °C. After washing with PBS, *T.*  
443 *gondii*-infected mouse serum (1:50) was used as the source of the primary antibody.  
444 The assay was then developed with anti-mouse peroxidase-conjugated secondary  
445 antibody, and the absorbance was measured at 450 nm in a microplate-scanning  
446 spectrophotometer (Power Wave-X; BioTek Instruments, Inc., Winooski, VT).

#### 447 **Mice and parasites**

448 Female C57BL/6 (WT), MyD88<sup>-/-</sup>, TRIF<sup>-/-</sup>, TLR2<sup>-/-</sup>, TLR3<sup>-/-</sup>, TLR4<sup>-/-</sup>, double  
449 knockout (DKO) TLR2<sup>-/-</sup>/TLR4<sup>-/-</sup>, TLR5<sup>-/-</sup>, and TLR9<sup>-/-</sup> mice (all from the C57BL/6  
450 background), 8 to 12 weeks of age, were acquired from the University of São Paulo -  
451 Ribeirão Preto campus animal facility, Ribeirão Preto, São Paulo, Brazil, and housed in  
452 the animal facility of the Department of Cell and Molecular Biology - Ribeirão Preto  
453 Medical School, under specific pathogen-free conditions. The TLR11<sup>-/-</sup>/TLR12<sup>-/-</sup> DKO

454 mice were maintained at American Association of Laboratory Animal Care-accredited  
455 animal facilities at NIAID/NIH.

456 A clonal isolate of the RH- $\Delta$ hxgprt strain of *T. gondii* was used as the recipient  
457 strain to generate TgMIC1-KO and TgMIC4-KO strains, as described previously [8].  
458 The TgMIC4-KO was produced from the TgMIC1-KO recipient strain to generate the  
459 TgMIC1/TgMIC4-DKO strain. Briefly, the previously described [8] TgMIC4-KO  
460 vector containing a chloramphenicol-resistant cassette was transfected in the TgMIC1-  
461 KO strain. Double homologous recombination was performed using the CRISPR/Cas9-  
462 based genome editing to facilitate the targeting of the *TgMIC4* locus. The specific  
463 gRNA/Cas9 were generated using the Q5 site-directed mutagenesis kit (New England  
464 Biolabs, Ipswich, MA), with pSAG1::CAS9-GFP-U6::sgUPRT as the template [50],  
465 using the primers ATGCAGTTGTA CTCTCCGTTTTAGAGCTAGAAATAGC  
466 and AACTTGACATCCCCATTTAC. Twenty micrograms of gRNA was transfected  
467 along with 40  $\mu$ g of the linearized KO vector. Parasites were transfected and selected as  
468 previously described [51, 52].

469 Strains were maintained in human foreskin fibroblast (HFF) cells grown in  
470 Dulbecco's modified Eagle's medium (DMEM) supplemented with 10% heat-  
471 inactivated foetal bovine serum (FBS), 0.25 mM gentamicin, 10 U/mL penicillin, and  
472 10  $\mu$ g/mL streptomycin (Gibco, Thermo Fisher Scientific Inc., Grand Island, NY).

#### 473 **Bone marrow-derived dendritic cells and macrophages**

474 Bone marrows of WT, MyD88<sup>-/-</sup>, TRIF<sup>-/-</sup>, TLR2<sup>-/-</sup>, TLR3<sup>-/-</sup>, TLR4<sup>-/-</sup>, DKO  
475 TLR2<sup>-/-</sup>/TLR4<sup>-/-</sup>, TLR5<sup>-/-</sup>, TLR9<sup>-/-</sup>, and DKO TLR11<sup>-/-</sup>/TLR12<sup>-/-</sup> mice were harvested  
476 from femurs and hind leg bones. Cells were washed with RPMI medium and  
477 resuspended in RPMI medium with 10% FBS, 10 U/mL penicillin, and 10  $\mu$ g/mL

478 streptomycin (Gibco). For dendritic cell (DC) differentiation, we added 10 ng/mL of  
479 recombinant murine GM-CSF (Preprotech, Rocky Hill, NJ), and 10 ng/mL murine  
480 recombinant IL-4 (eBioscience, San Diego, CA); for macrophage differentiation, 30%  
481 of L929 conditioned medium was added to RPMI medium with 10% FBS. The cells  
482 were cultured in 100 × 20 mm dish plates (Costar; Corning Inc., Corning, NY),  
483 supplemented with respective conditioned media at days 3 and 6 for DCs, and at day 4  
484 for macrophages. DCs were incubated for 8–9 days and macrophages for 7 days; the  
485 cells were then harvested and plated into 24-well plates at  $5 \times 10^5$  cells/well for protein  
486 stimulations or *T. gondii* infections, followed by ELISA.

#### 487 **HEK293T cells transfection**

488 Human embryonic kidney 293T (HEK293T) cells, originally acquired from  
489 American Tissue Culture Collection (ATCC, Rockville, MD), were used as an  
490 expression tool [53] for TLR2 and TLR4 [38, 54]. The cells grown in DMEM  
491 supplemented with 10% FBS (Gibco), and were seeded at  $3.5 \times 10^5$  cells/mL in 96-well  
492 plates ( $3.5 \times 10^4$  cells/well) 24 h before transfection. Then, HEK293T cells were  
493 transiently transfected (70-80% confluence) with human TLR2 plasmids as described  
494 previously [23] or with CD14, CD36, MD-2 and TLR4 [55] using Lipofectamine 2000  
495 (Invitrogen) with 60 ng of NF- $\kappa$ B Luc, an NF- $\kappa$ B reporter plasmid, and 0.5 ng of  
496 *Renilla* luciferase plasmid, together with 60 ng of each gene of single and multiple  
497 glycosylation mutants and of TLR2 WT genes [23]. After 24 h of transfection, the cells  
498 were stimulated overnight with positive controls: P3C (Pam3CSK4; EMC  
499 Microcollections, Tübingen, Germany), fibroblast stimulating ligand-1 (FSL-1; EMC  
500 Microcollections), or LPS Ultrapure (standard LPS, *E. coli* 0111:B4; Sigma-Aldrich); or  
501 with the negative control for cell stimulation (the medium). Cells transfected with  
502 empty vectors, incubated either with the medium or with agonists (FSL-1 or P3C), were

503 also assayed; negative results were required for each system included in the study. IL-8  
504 was detected in the culture supernatants. The absence of Mycoplasma contamination in  
505 the cell culture was certified by indirect fluorescence staining as described previously  
506 [56].

#### 507 **Cytokine measurement**

508 The quantification of human IL-8 and mouse IL-12p40, IL-6, TNF- $\alpha$ , and IL-10  
509 in the supernatant of the cultures was performed by ELISA, following the  
510 manufacturer's instructions (OptEIA set; BD Biosciences, San Jose, CA). Human and  
511 murine recombinant cytokines were used to generate standard curves and determine  
512 cytokine concentrations. The absorbance was read at 450 nm using the Power Wave-X  
513 spectrophotometer (BioTek Instruments).

#### 514 **TLR2-FLAG and TLR4-FLAG plasmids**

515 The pcDNA4/TO-FLAG plasmid was kindly provided by Dr. Dario Simões  
516 Zamboni. The pcDNA4-FLAG-TLR2 and pcDNA4-FLAG-TLR4 plasmids were  
517 constructed as follows. RNA from a P388D1 cell line (ATCC, Rockville, MD) was  
518 extracted and converted to cDNA with Maxima H Minus Reverse Transcriptase  
519 (Thermo-Fisher Scientific, Waltham, MA USA) and oligo(dT). TLR2 and TLR4 were  
520 amplified from total cDNA from murine macrophages by using Phusion High-Fidelity  
521 DNA Polymerase and the phosphorylated primers TLR2\_F:  
522 ATGCTACGAGCTCTTTGGCTCTTCTGG, TLR2\_R:  
523 CTAGGACTTTATTGCAGTTCTCAGATTTACCCAAAAC, TLR4\_F:  
524 TGCTTAGGATCCATGATGCCTCCCTGGCTCCTG and TLR4\_R:  
525 TGCTTAGCGGCCGCTCAGGTCCAAGTTGCCGTTTCTTG. The fragments were  
526 isolated from 1% agarose/Tris-acetate-ethylenediaminetetraacetic acid gel, purified with  
527 GeneJET Gel Extraction Kit (Thermo-Fisher Scientific), and inserted into the

528 pcDNA4/TO-FLAG vector by using the restriction enzymes sites for NotI and XbaI  
529 (Thermo-Fisher Scientific) for TLR2, and BamHI and NotI (Thermo-Fisher Scientific)  
530 for TLR4. Ligation reactions were performed by using a 3:1 insert/vector ratio with T4  
531 DNA Ligase (Thermo-Fisher Scientific) and transformed into chemically competent  
532 *Escherichia coli* DH5 $\alpha$  cells. Proper transformants were isolated from LB agar medium  
533 plates under ampicillin selection (100  $\mu$ g/mL) and analyzed by PCR, restriction  
534 fragment analysis, and DNA sequencing. All reactions were performed according to the  
535 manufacturer's instructions.

### 536 **Pull-down assay**

537 We used the lysate of HEK293T cells transfected (70-80% confluence) with  
538 plasmids containing TLR2-FLAG or TLR4-FLAG. After 24 h of transfection, the HEK  
539 cells were lysed with a non-denaturing lysis buffer (20 mM Tris, pH 8.0, 137 mM NaCl,  
540 and 2 mM EDTA) supplemented with a protease inhibitor (Roche, Basel, Switzerland).  
541 After 10 min of incubation on ice, the lysate was subjected to centrifugation (16,000 g,  
542 at 4 °C for 5 min). The protein content in the supernatant was quantified by the BCA  
543 method, aliquoted, and stored at -80 °C. For the pull-down assay, 100  $\mu$ g of the lysate  
544 from TLR2-FLAG- or TLR4-FLAG-transfected HEK cells were incubated with 10  $\mu$ g  
545 of TgMIC1 or TgMIC4 overnight at 4 °C. Since these proteins had a histidine tag, the  
546 samples were purified on nickel-affinity resin (Ni Sepharose High Performance; GE  
547 Healthcare, Little Chalfont, UK) after incubation for 30 min at 25 °C and centrifugation  
548 of the fraction bound to nickel to pull down the TgMIC-His that physically interacted  
549 with TLR-FLAG (16,000 g, 4 °C, 5 min). After washing with PBS, the samples were  
550 resuspended in 100  $\mu$ L of SDS loading dye with 5  $\mu$ L of 2-mercaptoethanol, heated for  
551 5 min at 95 °C, and 25  $\mu$ L of total volume was run on 10% SDS-PAGE. After  
552 transferring to a nitrocellulose membrane (Millipore, Billerica, MA), immunoblotting

553 was performed by following the manufacturer's protocol. First, the membrane was  
554 incubated with anti-FLAG monoclonal antibodies (1:2,000) (Clone G10, ab45766,  
555 Sigma-Aldrich) to detect the presence of TLR2 or TLR4. The same membrane was then  
556 subjected to secondary probing and was developed with anti-TgMIC1 or anti-TgMIC4  
557 polyclonal antibodies (IgY; 1:20,000) and followed by incubation with secondary  
558 polyclonal anti-chicken IgY-HRP (1:4,000) (A9046, Sigma-Aldrich) to confirm the  
559 presence of TgMIC1 and TgMIC4.

### 560 ***Toxoplasma gondii* infection**

561 Bone marrow-derived dendritic cells (BMDCs) and bone marrow-derived  
562 macrophages (BMDMs) were infected with WT RH- $\Delta$ hxgprt, TgMIC1-KO, TgMIC4-  
563 KO, or TgMIC1/TgMIC4-DKO strains recovered from T25 flasks with HFF cell  
564 cultures. The T25 flasks were washed with RPMI medium to completely remove  
565 parasites, and the collected material was centrifuged for 5 min at 50 g to remove HFF  
566 cell debris. The resulting pellet was discarded, and the supernatant containing the  
567 parasites was centrifuged for 10 min at 1,000 g and resuspended in RPMI medium for  
568 counting and concentration adjustments. BMDCs and BMDMs were dispensed in 24-  
569 well plates at  $5 \times 10^5$  cells/well (in RPMI medium supplemented with 10% FBS),  
570 followed by infection with 3 parasites per cell (multiplicity of infection, MOI 3). Then,  
571 the plate was centrifuged for 3 min at 200 g to synchronize the contact between cells  
572 and parasites and incubated at 37 °C. The supernatants were collected at 6, 12, 24, and  
573 48 h after infection for quantification of IL-12p40.

### 574 **Statistical analysis**

575 The data were plotted and analysed using GraphPad Prism 6.0 software  
576 (GraphPad, La Jolla, CA). Statistical significance of the obtained results was calculated

577 using analysis of variance (One-way ANOVA) followed by Bonferroni's multiple  
578 comparisons. Differences were considered significant when the *P* value was <0.05.

579

## 580 **ACKNOWLEDGEMENTS**

581 We are grateful to Dr. Tiago Wilson Patriarca Mineo (Universidade Federal de  
582 Uberlândia - MG) for kindly provided us the wild type *Toxoplasma gondii* (RH); to Dr.  
583 Larissa Dias Cunha and Dr. Dario Simões Zamboni (Universidade de São Paulo - SP)  
584 for help with double knockout TLR2/TLR4 mice generation and for kindly provide the  
585 pcDNA4/TO-FLAG plasmid; to Izaíra Tincani Brandão and Ana Paula Masson for  
586 technical assistance with endotoxin measurements; to Patricia Vendrusculo, Sandra  
587 Thomaz and Sara Hieny for all technical support essential for this study. We wish to  
588 acknowledge the grants from Consortium for Functional Glycomics (#GM62116), for  
589 doing the glycoarray assays; UK Medical Research Council (#G1000133 to N.J.G.), and  
590 Wellcome Investigator Award (#WT100321/z/12/Z to N.J.G.).

591

## 592 **REFERENCES**

- 593 1. Dubey JP. Toxoplasmosis of animals and humans. 2nd ed. Boca Raton, FL,  
594 USA: CRC Press; 2009. 336 p.
- 595 2. Scallan E, Hoekstra RM, Angulo FJ, Tauxe RV, Widdowson MA, Roy SL, et al.  
596 Foodborne illness acquired in the United States--major pathogens. Emerging infectious  
597 diseases. 2011;17(1):7-15. Epub 2011/01/05. doi:  
598 10.3201/eid1701.P1110110.3201/eid1701.091101p1. PubMed PMID: 21192848;  
599 PubMed Central PMCID: PMC3375761.



- 600 3. Carruthers VB, Sibley LD. Sequential protein secretion from three distinct  
601 organelles of *Toxoplasma gondii* accompanies invasion of human fibroblasts. *Eur J Cell*  
602 *Biol.* 1997;73(2):114-23. Epub 1997/06/01. PubMed PMID: 9208224.
- 603 4. Carruthers VB, Giddings OK, Sibley LD. Secretion of micronemal proteins is  
604 associated with toxoplasma invasion of host cells. *Cell Microbiol.* 1999;1(3):225-35.  
605 Epub 2001/02/24. PubMed PMID: 11207555.
- 606 5. Lovett JL, Sibley LD. Intracellular calcium stores in *Toxoplasma gondii* govern  
607 invasion of host cells. *J Cell Sci.* 2003;116(Pt 14):3009-16. Epub 2003/06/05. doi:  
608 10.1242/jcs.00596. PubMed PMID: 12783987.
- 609 6. Tomley FM, Soldati DS. Mix and match modules: structure and function of  
610 microneme proteins in apicomplexan parasites. *Trends in parasitology.* 2001;17(2):81-8.  
611 Epub 2001/03/03. PubMed PMID: 11228014.
- 612 7. Carruthers VB, Tomley FM. Microneme proteins in apicomplexans. *Subcell*  
613 *Biochem.* 2008;47:33-45. Epub 2008/06/03. PubMed PMID: 18512339; PubMed  
614 Central PMCID: PMC2847500.
- 615 8. Reiss M, Viebig N, Brecht S, Fourmaux MN, Soete M, Di Cristina M, et al.  
616 Identification and characterization of an escorter for two secretory adhesins in  
617 *Toxoplasma gondii*. *J Cell Biol.* 2001;152(3):563-78. Epub 2001/02/07. PubMed PMID:  
618 11157983; PubMed Central PMCID: PMC2196004.
- 619 9. Friedrich N, Santos JM, Liu Y, Palma AS, Leon E, Saouros S, et al. Members of  
620 a novel protein family containing microneme adhesive repeat domains act as sialic acid-  
621 binding lectins during host cell invasion by apicomplexan parasites. *J Biol Chem.*  
622 2010;285(3):2064-76. Epub 2009/11/11. doi: 10.1074/jbc.M109.060988. PubMed  
623 PMID: 19901027; PubMed Central PMCID: PMC2804363.

- 624 10. Cerede O, Dubremetz JF, Soete M, Deslee D, Vial H, Bout D, et al. Synergistic  
625 role of micronemal proteins in *Toxoplasma gondii* virulence. *J Exp Med*.  
626 2005;201(3):453-63. Epub 2005/02/03. doi: 10.1084/jem.20041672. PubMed PMID:  
627 15684324; PubMed Central PMCID: PMC2213027.
- 628 11. Blumenschein TM, Friedrich N, Childs RA, Saouros S, Carpenter EP,  
629 Campanero-Rhodes MA, et al. Atomic resolution insight into host cell recognition by  
630 *Toxoplasma gondii*. *EMBO J*. 2007;26(11):2808-20. Epub 2007/05/12. doi:  
631 10.1038/sj.emboj.7601704. PubMed PMID: 17491595; PubMed Central PMCID:  
632 PMC1888667.
- 633 12. Monteiro VG, Soares CP, de Souza W. Host cell surface sialic acid residues are  
634 involved on the process of penetration of *Toxoplasma gondii* into mammalian cells.  
635 *FEMS Microbiol Lett*. 1998;164(2):323-7. Epub 1998/07/31. PubMed PMID: 9682481.
- 636 13. Ortega-Barria E, Boothroyd JC. A *Toxoplasma* lectin-like activity specific for  
637 sulfated polysaccharides is involved in host cell infection. *J Biol Chem*.  
638 1999;274(3):1267-76. Epub 1999/01/09. PubMed PMID: 9880495.
- 639 14. Carruthers VB, Hakansson S, Giddings OK, Sibley LD. *Toxoplasma gondii* uses  
640 sulfated proteoglycans for substrate and host cell attachment. *Infect Immun*.  
641 2000;68(7):4005-11. Epub 2000/06/17. PubMed PMID: 10858215; PubMed Central  
642 PMCID: PMC101681.
- 643 15. Paing MM, Tolia NH. Multimeric assembly of host-pathogen adhesion  
644 complexes involved in apicomplexan invasion. *PLoS Pathog*. 2014;10(6):e1004120.  
645 Epub 2014/06/20. doi: 10.1371/journal.ppat.1004120. PubMed PMID: 24945143;  
646 PubMed Central PMCID: PMC4055764.
- 647 16. Brecht S, Carruthers VB, Ferguson DJ, Giddings OK, Wang G, Jakle U, et al.  
648 The *Toxoplasma* micronemal protein MIC4 is an adhesin composed of six conserved

- 649 apple domains. *J Biol Chem*. 2001;276(6):4119-27. Epub 2000/10/29. doi:  
650 10.1074/jbc.M008294200. PubMed PMID: 11053441.
- 651 17. Lourenco EV, Pereira SR, Faca VM, Coelho-Castelo AA, Mineo JR, Roque-  
652 Barreira MC, et al. *Toxoplasma gondii* micronemal protein MIC1 is a lactose-binding  
653 lectin. *Glycobiology*. 2001;11(7):541-7. Epub 2001/07/12. PubMed PMID: 11447133.
- 654 18. Marchant J, Cowper B, Liu Y, Lai L, Pinzan C, Marq JB, et al. Galactose  
655 recognition by the apicomplexan parasite *Toxoplasma gondii*. *J Biol Chem*.  
656 2012;287(20):16720-33. Epub 2012/03/09. doi: 10.1074/jbc.M111.325928. PubMed  
657 PMID: 22399295; PubMed Central PMCID: PMC3351351.
- 658 19. Yarovinsky F. Toll-like receptors and their role in host resistance to *Toxoplasma*  
659 *gondii*. *Immunol Lett*. 2008;119(1-2):17-21. Epub 2008/07/12. doi:  
660 10.1016/j.imlet.2008.05.007. PubMed PMID: 18617274.
- 661 20. Lourenco EV, Bernardes ES, Silva NM, Mineo JR, Panunto-Castelo A, Roque-  
662 Barreira MC. Immunization with MIC1 and MIC4 induces protective immunity against  
663 *Toxoplasma gondii*. *Microbes Infect*. 2006;8(5):1244-51. Epub 2006/04/18. doi:  
664 10.1016/j.micinf.2005.11.013. PubMed PMID: 16616574.
- 665 21. Pinzan CF, Sardinha-Silva A, Almeida F, Lai L, Lopes CD, Lourenco EV, et al.  
666 Vaccination with Recombinant Microneme Proteins Confers Protection against  
667 Experimental Toxoplasmosis in Mice. *PLoS One*. 2015;10(11):e0143087. Epub  
668 2015/11/18. doi: 10.1371/journal.pone.0143087. PubMed PMID: 26575028; PubMed  
669 Central PMCID: PMC4648487.
- 670 22. Yarovinsky F. Innate immunity to *Toxoplasma gondii* infection. *Nat Rev*  
671 *Immunol*. 2014;14(2):109-21. Epub 2014/01/25. doi: 10.1038/nri3598. PubMed PMID:  
672 24457485.

- 673 23. Weber AN, Morse MA, Gay NJ. Four N-linked glycosylation sites in human  
674 toll-like receptor 2 cooperate to direct efficient biosynthesis and secretion. *J Biol Chem.*  
675 2004;279(33):34589-94. Epub 2004/06/03. doi: 10.1074/jbc.M403830200. PubMed  
676 PMID: 15173186.
- 677 24. Santos A, Carvalho FC, Roque-Barreira MC, Zorzetto-Fernandes AL, Gimenez-  
678 Romero D, Monzo I, et al. Evidence for Conformational Mechanism on the Binding of  
679 TgMIC4 with beta-Galactose-Containing Carbohydrate Ligand. *Langmuir.*  
680 2015;31(44):12111-9. Epub 2015/10/22. doi: 10.1021/acs.langmuir.5b03141. PubMed  
681 PMID: 26488670.
- 682 25. Hager KM, Carruthers VB. MARveling at parasite invasion. *Trends in*  
683 *parasitology.* 2008;24(2):51-4. Epub 2008/01/22. doi: 10.1016/j.pt.2007.10.008.  
684 PubMed PMID: 18203663; PubMed Central PMCID: PMC2662992.
- 685 26. Jankovic D, Kullberg MC, Feng CG, Goldszmid RS, Collazo CM, Wilson M, et  
686 al. Conventional T-bet(+)Foxp3(-) Th1 cells are the major source of host-protective  
687 regulatory IL-10 during intracellular protozoan infection. *J Exp Med.* 2007;204(2):273-  
688 83. Epub 2007/02/07. doi: 10.1084/jem.20062175. PubMed PMID: 17283209; PubMed  
689 Central PMCID: PMC2118735.
- 690 27. Yarovinsky F, Zhang D, Andersen JF, Bannenberg GL, Serhan CN, Hayden MS,  
691 et al. TLR11 activation of dendritic cells by a protozoan profilin-like protein. *Science.*  
692 2005;308(5728):1626-9. Epub 2005/04/30. doi: 10.1126/science.1109893. PubMed  
693 PMID: 15860593.
- 694 28. da Silva Correia J, Ulevitch RJ. MD-2 and TLR4 N-linked glycosylations are  
695 important for a functional lipopolysaccharide receptor. *J Biol Chem.* 2002;277(3):1845-  
696 54. Epub 2001/11/14. doi: 10.1074/jbc.M109910200. PubMed PMID: 11706042.

- 697 29. Koblansky AA, Jankovic D, Oh H, Hieny S, Sungnak W, Mathur R, et al.  
698 Recognition of profilin by Toll-like receptor 12 is critical for host resistance to  
699 *Toxoplasma gondii*. *Immunity*. 2013;38(1):119-30. Epub 2012/12/19. doi:  
700 10.1016/j.immuni.2012.09.016. PubMed PMID: 23246311; PubMed Central PMCID:  
701 PMC3601573.
- 702 30. Yang CS, Yuk JM, Lee YH, Jo EK. *Toxoplasma gondii* GRA7-Induced TRAF6  
703 Activation Contributes to Host Protective Immunity. *Infect Immun*. 2015;84(1):339-50.  
704 Epub 2015/11/11. doi: 10.1128/IAI.00734-15. PubMed PMID: 26553469; PubMed  
705 Central PMCID: PMC4693986.
- 706 31. Rosowski EE, Lu D, Julien L, Rodda L, Gaiser RA, Jensen KD, et al. Strain-  
707 specific activation of the NF-kappaB pathway by GRA15, a novel *Toxoplasma gondii*  
708 dense granule protein. *J Exp Med*. 2011;208(1):195-212. Epub 2011/01/05. doi:  
709 10.1084/jem.20100717. PubMed PMID: 21199955; PubMed Central PMCID:  
710 PMC3023140.
- 711 32. Braun L, Brenier-Pinchart MP, Yogavel M, Curt-Varesano A, Curt-Bertini RL,  
712 Hussain T, et al. A *Toxoplasma* dense granule protein, GRA24, modulates the early  
713 immune response to infection by promoting a direct and sustained host p38 MAPK  
714 activation. *The Journal of experimental medicine*. 2013;210(10):2071-86. Epub  
715 2013/09/18. doi: 10.1084/jem.20130103. PubMed PMID: 24043761; PubMed Central  
716 PMCID: PMC3782045.
- 717 33. Takabatake N, Okamura M, Yokoyama N, Ikehara Y, Akimitsu N, Arimitsu N,  
718 et al. Glycophorin A-knockout mice, which lost sialoglycoproteins from the red blood  
719 cell membrane, are resistant to lethal infection of *Babesia rodhaini*. *Vet Parasitol*.  
720 2007;148(2):93-101. Epub 2007/07/27. doi: 10.1016/j.vetpar.2007.06.011. PubMed  
721 PMID: 17651898.

- 722 34. Persson KE, McCallum FJ, Reiling L, Lister NA, Stubbs J, Cowman AF, et al.  
723 Variation in use of erythrocyte invasion pathways by *Plasmodium falciparum* mediates  
724 evasion of human inhibitory antibodies. *J Clin Invest*. 2008;118(1):342-51. Epub  
725 2007/12/08. doi: 10.1172/JCI32138. PubMed PMID: 18064303; PubMed Central  
726 PMCID: PMC2117763.
- 727 35. Favila MA, Geraci NS, Jayakumar A, Hickerson S, Mostrom J, Turco SJ, et al.  
728 Differential Impact of LPG-and PG-Deficient *Leishmania major* Mutants on the  
729 Immune Response of Human Dendritic Cells. *PLoS Negl Trop Dis*.  
730 2015;9(12):e0004238. Epub 2015/12/03. doi: 10.1371/journal.pntd.0004238. PubMed  
731 PMID: 26630499; PubMed Central PMCID: PMC4667916.
- 732 36. Nogueira PM, Assis RR, Torrecilhas AC, Saraiva EM, Pessoa NL, Campos MA,  
733 et al. Lipophosphoglycans from *Leishmania amazonensis* Strains Display  
734 Immunomodulatory Properties via TLR4 and Do Not Affect Sand Fly Infection. *PLoS*  
735 *Negl Trop Dis*. 2016;10(8):e0004848. Epub 2016/08/11. doi:  
736 10.1371/journal.pntd.0004848. PubMed PMID: 27508930; PubMed Central PMCID:  
737 PMC4980043.
- 738 37. Freitas MS, Oliveira AF, da Silva TA, Fernandes FF, Goncales RA, Almeida F,  
739 et al. Paracoccin Induces M1 Polarization of Macrophages via Interaction with TLR4.  
740 *Front Microbiol*. 2016;7:1003. Epub 2016/07/28. doi: 10.3389/fmicb.2016.01003.  
741 PubMed PMID: 27458431; PubMed Central PMCID: PMC4932198.
- 742 38. Alegre-Maller AC, Mendonca FC, da Silva TA, Oliveira AF, Freitas MS, Hanna  
743 ES, et al. Therapeutic administration of recombinant Paracoccin confers protection  
744 against paracoccidioides brasiliensis infection: involvement of TLRs. *PLoS Negl Trop*  
745 *Dis*. 2014;8(12):e3317. doi: 10.1371/journal.pntd.0003317. PubMed PMID: 25474158;  
746 PubMed Central PMCID: PMC4256291.

- 747 39. Campbell D, Mann BJ, Chadee K. A subunit vaccine candidate region of the  
748 *Entamoeba histolytica* galactose-adherence lectin promotes interleukin-12 gene  
749 transcription and protein production in human macrophages. *Eur J Immunol.*  
750 2000;30(2):423-30. Epub 2000/02/12. doi: 10.1002/1521-4141(200002)30:2<423::AID-  
751 IMMU423>3.0.CO;2-0. PubMed PMID: 10671197.
- 752 40. Murakami S, Iwaki D, Mitsuzawa H, Sano H, Takahashi H, Voelker DR, et al.  
753 Surfactant protein A inhibits peptidoglycan-induced tumor necrosis factor-alpha  
754 secretion in U937 cells and alveolar macrophages by direct interaction with toll-like  
755 receptor 2. *J Biol Chem.* 2002;277(9):6830-7. Epub 2001/11/29. doi:  
756 10.1074/jbc.M106671200. PubMed PMID: 11724772.
- 757 41. Unitt J, Hornigold D. Plant lectins are novel Toll-like receptor agonists.  
758 *Biochem Pharmacol.* 2011;81(11):1324-8. Epub 2011/03/23. doi:  
759 10.1016/j.bcp.2011.03.010. PubMed PMID: 21420389.
- 760 42. Souza MA, Carvalho FC, Ruas LP, Ricci-Azevedo R, Roque-Barreira MC. The  
761 immunomodulatory effect of plant lectins: a review with emphasis on ArtinM  
762 properties. *Glycoconj J.* 2013;30(7):641-57. Epub 2013/01/10. doi: 10.1007/s10719-  
763 012-9464-4. PubMed PMID: 23299509; PubMed Central PMCID: PMC3769584.
- 764 43. Andrade WA, Souza Mdo C, Ramos-Martinez E, Nagpal K, Dutra MS, Melo  
765 MB, et al. Combined action of nucleic acid-sensing Toll-like receptors and  
766 TLR11/TLR12 heterodimers imparts resistance to *Toxoplasma gondii* in mice. *Cell*  
767 *Host Microbe.* 2013;13(1):42-53. Epub 2013/01/08. doi: 10.1016/j.chom.2012.12.003.  
768 PubMed PMID: 23290966; PubMed Central PMCID: PMC3552114.
- 769 44. Debierre-Grockiego F, Campos MA, Azzouz N, Schmidt J, Bieker U, Resende  
770 MG, et al. Activation of TLR2 and TLR4 by glycosylphosphatidylinositols derived

- 771 from *Toxoplasma gondii*. *J Immunol.* 2007;179(2):1129-37. Epub 2007/07/10. PubMed  
772 PMID: 17617606.
- 773 45. Qiu J, Wang L, Zhang R, Ge K, Guo H, Liu X, et al. Identification of a TNF-  
774 alpha inducer MIC3 originating from the microneme of non-cystogenic, virulent  
775 *Toxoplasma gondii*. *Scientific reports.* 2016;6:39407. Epub 2016/12/22. doi:  
776 10.1038/srep39407. PubMed PMID: 28000706; PubMed Central PMCID:  
777 PMC5175157.
- 778 46. Scanga CA, Aliberti J, Jankovic D, Tilloy F, Bennouna S, Denkers EY, et al.  
779 Cutting edge: MyD88 is required for resistance to *Toxoplasma gondii* infection and  
780 regulates parasite-induced IL-12 production by dendritic cells. *J Immunol.*  
781 2002;168(12):5997-6001. Epub 2002/06/11. PubMed PMID: 12055206.
- 782 47. Plattner F, Yarovinsky F, Romero S, Didry D, Carlier MF, Sher A, et al.  
783 *Toxoplasma* profilin is essential for host cell invasion and TLR11-dependent induction  
784 of an interleukin-12 response. *Cell Host Microbe.* 2008;3(2):77-87. Epub 2008/03/04.  
785 doi: 10.1016/j.chom.2008.01.001. PubMed PMID: 18312842.
- 786 48. Saouros S, Edwards-Jones B, Reiss M, Sawmynaden K, Cota E, Simpson P, et  
787 al. A novel galectin-like domain from *Toxoplasma gondii* micronemal protein 1 assists  
788 the folding, assembly, and transport of a cell adhesion complex. *J Biol Chem.*  
789 2005;280(46):38583-91. Epub 2005/09/17. doi: 10.1074/jbc.C500365200. PubMed  
790 PMID: 16166092.
- 791 49. von Gunten S, Smith DF, Cummings RD, Riedel S, Miescher S, Schaub A, et al.  
792 Intravenous immunoglobulin contains a broad repertoire of anticarbohydrate antibodies  
793 that is not restricted to the IgG2 subclass. *J Allergy Clin Immunol.* 2009;123(6):1268-  
794 76 e15. Epub 2009/05/16. doi: 10.1016/j.jaci.2009.03.013. PubMed PMID: 19443021;  
795 PubMed Central PMCID: PMC2777748.



- 796 50. Shen B, Brown KM, Lee TD, Sibley LD. Efficient gene disruption in diverse  
797 strains of *Toxoplasma gondii* using CRISPR/CAS9. *mBio*. 2014;5(3):e01114-14. Epub  
798 2014/05/16. doi: 10.1128/mBio.01114-14. PubMed PMID: 24825012; PubMed Central  
799 PMCID: PMC4030483.
- 800 51. Soldati D, Boothroyd JC. Transient transfection and expression in the obligate  
801 intracellular parasite *Toxoplasma gondii*. *Science*. 1993;260(5106):349-52. Epub  
802 1993/04/16. PubMed PMID: 8469986.
- 803 52. Kim K, Soldati D, Boothroyd JC. Gene replacement in *Toxoplasma gondii* with  
804 chloramphenicol acetyltransferase as selectable marker. *Science*. 1993;262(5135):911-  
805 4. Epub 1993/11/05. PubMed PMID: 8235614.
- 806 53. Aricescu AR, Owens RJ. Expression of recombinant glycoproteins in  
807 mammalian cells: towards an integrative approach to structural biology. *Curr Opin*  
808 *Struct Biol*. 2013;23(3):345-56. doi: 10.1016/j.sbi.2013.04.003. PubMed PMID:  
809 23623336; PubMed Central PMCID: PMC4757734.
- 810 54. Mariano VS, Zorzetto-Fernandes AL, da Silva TA, Ruas LP, Nohara LL,  
811 Almeida IC, et al. Recognition of TLR2 N-glycans: critical role in ArtinM  
812 immunomodulatory activity. *PLoS One*. 2014;9(6):e98512. doi:  
813 10.1371/journal.pone.0098512. PubMed PMID: 24892697; PubMed Central PMCID:  
814 PMC4043963.
- 815 55. Carneiro AB, Iaciura BM, Nohara LL, Lopes CD, Veas EM, Mariano VS, et al.  
816 Lysophosphatidylcholine triggers TLR2- and TLR4-mediated signaling pathways but  
817 counteracts LPS-induced NO synthesis in peritoneal macrophages by inhibiting NF-  
818 kappaB translocation and MAPK/ERK phosphorylation. *PLoS One*. 2013;8(9):e76233.  
819 doi: 10.1371/journal.pone.0076233. PubMed PMID: 24312681; PubMed Central  
820 PMCID: PMC3848743.

821 56. Young L, Sung J, Stacey G, Masters JR. Detection of Mycoplasma in cell  
822 cultures. Nat Protoc. 2010;5(5):929-34. doi: 10.1038/nprot.2010.43. PubMed PMID:  
823 20431538.

824

## 825 **AUTHOR INFORMATION**

### 826 **Aline Sardinha-Silva**

827 Present Address: Molecular Parasitology Section, Laboratory of Parasitic Diseases,  
828 National Institute of Allergy and Infectious Diseases, National Institutes of Health, 9000  
829 Rockville Pike, Bethesda, MD 20892, USA.

830

## 831 **AFFILIATIONS**

832 **Department of Cell and Molecular Biology and Pathogenic Bioagents, Ribeirão**  
833 **Preto Medical School, University of São Paulo- USP (FMRP/USP), Ribeirão Preto,**  
834 **São Paulo, 14049-900, Brazil**

835 Aline Sardinha-Silva, Flávia C. Mendonça-Natividade, Camila F. Pinzan, Carla D.  
836 Lopes, Fabrício F. Fernandes, André L. V. Zorzetto-Fernandes & Maria Cristina Roque-  
837 Barreira

838

839 **Immunobiology Section, Laboratory of Parasitic Diseases, National Institute of**  
840 **Allergy and Infectious Diseases, National Institutes of Health, Bethesda, MD**  
841 **20892, USA**

842 Diego L. Costa, Alan Sher & Dragana Jankovic

843

844 **Department of Microbiology and Molecular Medicine, CMU, University of**  
845 **Geneva, 1 rue Michel-Servet, 1211 Geneva 4, Switzerland**

846 Damien Jacot & Dominique Soldati-Favre

847

848 **Department of Biochemistry, Cambridge University, 80 Tennis Court Road**

849 **Cambridge CB2 1GA, United Kingdom**

850 Nicholas J. Gay

851

852 **Molecular Parasitology Section, Laboratory of Parasitic Diseases, National**

853 **Institute of Allergy and Infectious Diseases, National Institutes of Health,**

854 **Bethesda, MD 20892, USA**

855 Michael E. Grigg

856

857 **CONTRIBUTIONS**

858 A.S.S., F.C.M.N. and M.C.R.B. designed the experiments; A.S.S., F.C.M.N., C.F.P.,

859 C.D.L., D.L.C., F.F.F., A.L.V.Z.F. and D.Jan. performed the experiments; A.S.S.,

860 F.C.M.N. and C.D.L. and processed and analysed the data; D.Jac. and D.S.F. generated

861 the *Toxoplasma gondii* knockout strains; N.J.G., M.E.G and A.S. provided

862 reagents/material and contributed for the final manuscript writing; A.S.S., F.C.M.N.,

863 and M.C.R.B. wrote the manuscript; and all authors commented on the manuscript.

864

865 **COMPETING INTERESTS**

866 The authors declare no competing financial interests

867

868 **CORRESPONDING AUTHOR**

869 Maria Cristina Roque-Barreira, Phone: +55-16-3315-3062, e-mail:

870 mcrbarre@fmrp.usp.br

871 **FIGURES and LEGENDS**

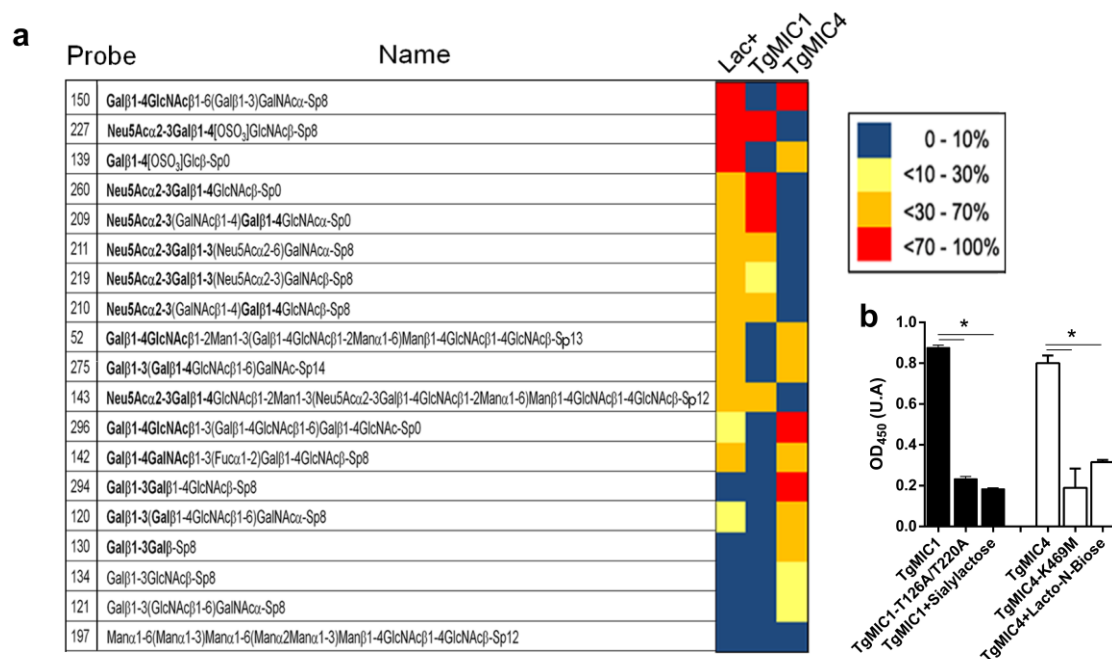

872

873 **Fig 1. Lectin activity of TgMIC1 and TgMIC4. (A)** Glycoarray of the native  
 874 TgMIC1/TgMIC4 subcomplex (Lac<sup>+</sup>) and of the recombinant forms of TgMIC1 and  
 875 TgMIC4. In total, 320 oligosaccharide probes were analysed by reading their  
 876 fluorescence intensities, and the 20 best recognized glycans are shown. The results were  
 877 represented as previously reported [18]. **(B)** The activity and inhibition assays were  
 878 performed in microplates coated with glycoproteins with or without sialic acid, fetuin  
 879 (black bars), or asialofetuin (white bars), separately. After coating, wild type or mutated  
 880 TgMIC1 and TgMIC4, pre-incubated with PBS or their corresponding sugars, were  
 881 added to the wells. Later, bound proteins were detected through the addition of serum  
 882 from *T. gondii*-infected mice. Data in **(B)** are expressed as mean ±S.D. of triplicate wells  
 883 and significance was calculated with ANOVA. \*P<0.05. Data are representative of two  
 884 **(B)** independent experiments. Gal: galactose; GalNAc: *N*-acetylgalactosamine; Glc:  
 885 glucose; Man: mannose; Fuc: fucose; Neu5Ac: *N*-acetylneuraminic acid; wt: wild type

886 protein; mut: protein with a mutation in the carbohydrate-recognition domain (CRD); ns:

887 not significant.

888

889

890

891

892

893

894

895

896

897

898

899

900

901

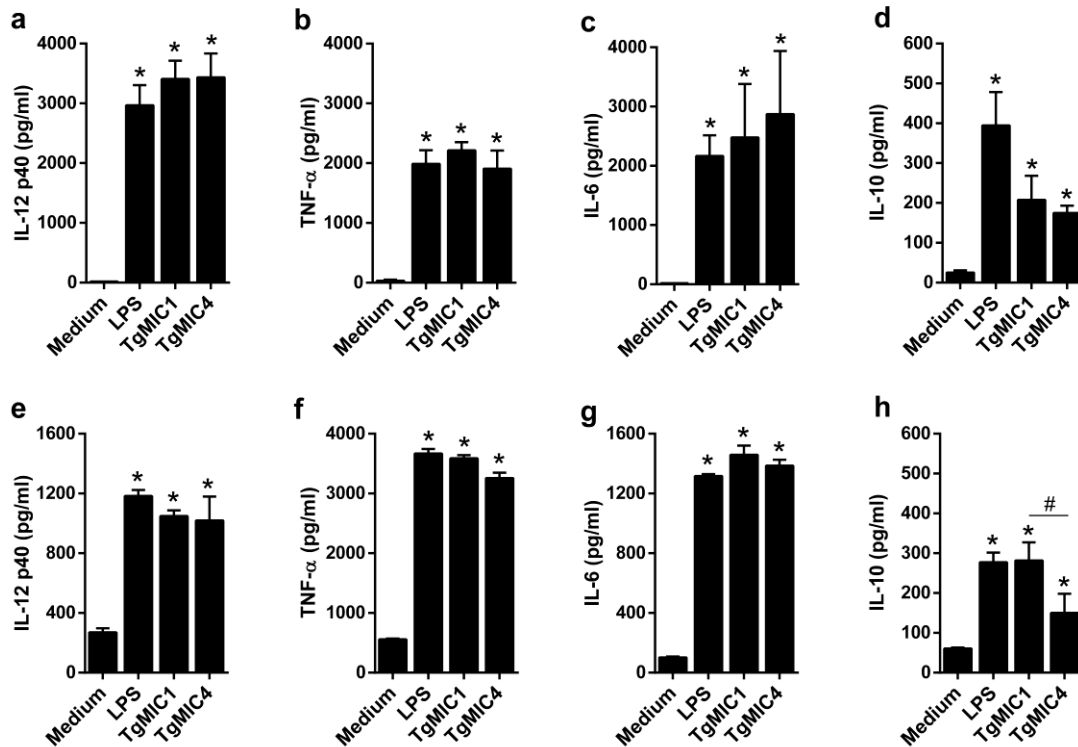

902

903 **Fig 2. Microneme proteins stimulate proinflammatory cytokine production by**

904 **dendritic cells and macrophages. (A-D)** Bone marrow-derived dendritic cells and (E-

905 **H)** bone marrow-derived macrophages from C57BL/6 mice were stimulated with

906 TgMIC1 (5 µg/mL) and TgMIC4 (5 µg/mL) for 48 h. LPS (100 ng/mL) was used as

907 positive control. The levels of IL-12p40, TNF-α, and IL-6 were measured by ELISA.

908 Data are expressed as mean ±S.D. of triplicate wells and significance was calculated

909 with ANOVA. \*P<0.05. Data are representative of three independent experiments.

910

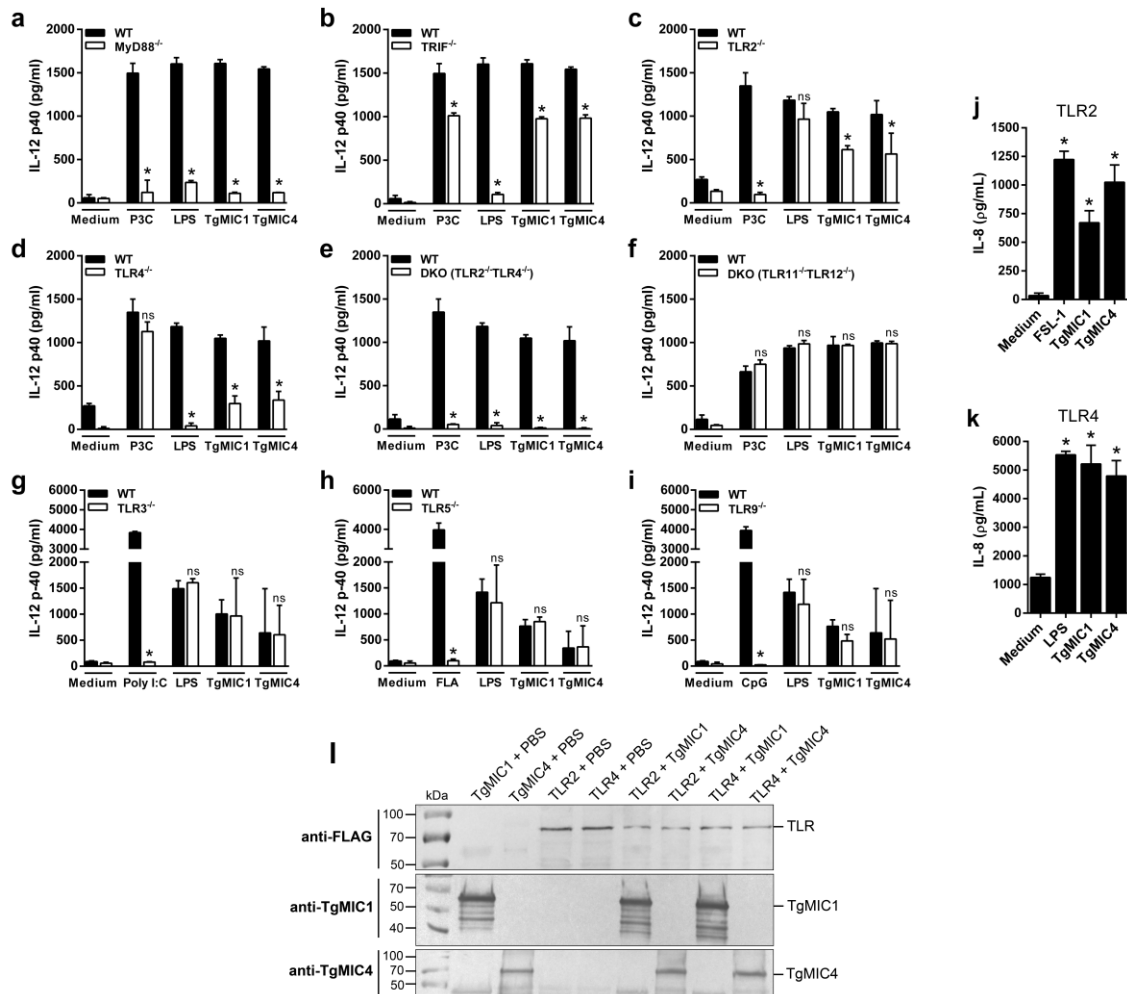

911

912 **Fig 3. The IL-12 production induced by TgMICs is dependent on binding to TLR2**

913 **and TLR4. (A-I)** Bone marrow-derived macrophages from WT, TLR2<sup>-/-</sup>, TLR4<sup>-/-</sup>,

914 double knockout TLR2<sup>-/-</sup>/TLR4<sup>-/-</sup>, TLR3<sup>-/-</sup>, TLR5<sup>-/-</sup>, TLR9<sup>-/-</sup>, and double knockout

915 TLR11<sup>-/-</sup>/TLR12<sup>-/-</sup> mice, all of the C57BL/6 background, were stimulated with TgMIC1

916 or TgMIC4 (5 µg/mL) for 48 h. Pam3CSK4 (P3C) (1 µg/mL), LPS (100 ng/mL), Poly

917 I:C (10 µg/mL), Flagellin (FLA) (1 µg/mL) and CpG (25 µg/mL) were used as positive

918 controls. IL-12p40 levels were measured by ELISA. **(J and K)** Transfected HEK293T

919 cells expressing TLR2 were stimulated with TgMIC1 (750 nM) or TgMIC4 (500 nM),

920 and TgMIC1 (200 nM) or TgMIC4 (160 nM) for HEK cells expressing TLR4, for 24 h.

921 FSL-1 (100 ng/mL) and LPS (100 ng/mL) were used as positive controls. IL-8 levels

922 were measured by ELISA. **(L)** The interaction between TgMICs and TLRs was

923 evaluated by western blot. HEK293T cells transiently expressing TLR2-Flag and TLR4-  
924 Flag were lysed and incubated with His-TgMIC1 (WT) or His-TgMIC4 (WT). His-  
925 TgMICs were subjected to Ni-affinity resin pull-down and analysed for TLR2 and  
926 TLR4 binding by protein blotting with antibodies specific for Flag and then for TgMIC.  
927 Data in (A-K) are expressed as mean  $\pm$ S.D. of triplicate wells and significance was  
928 calculated with ANOVA. \*P<0.05. Data are representative of three (A-K) and two (L)  
929 independent experiments.

930

931

932

933

934

935

936



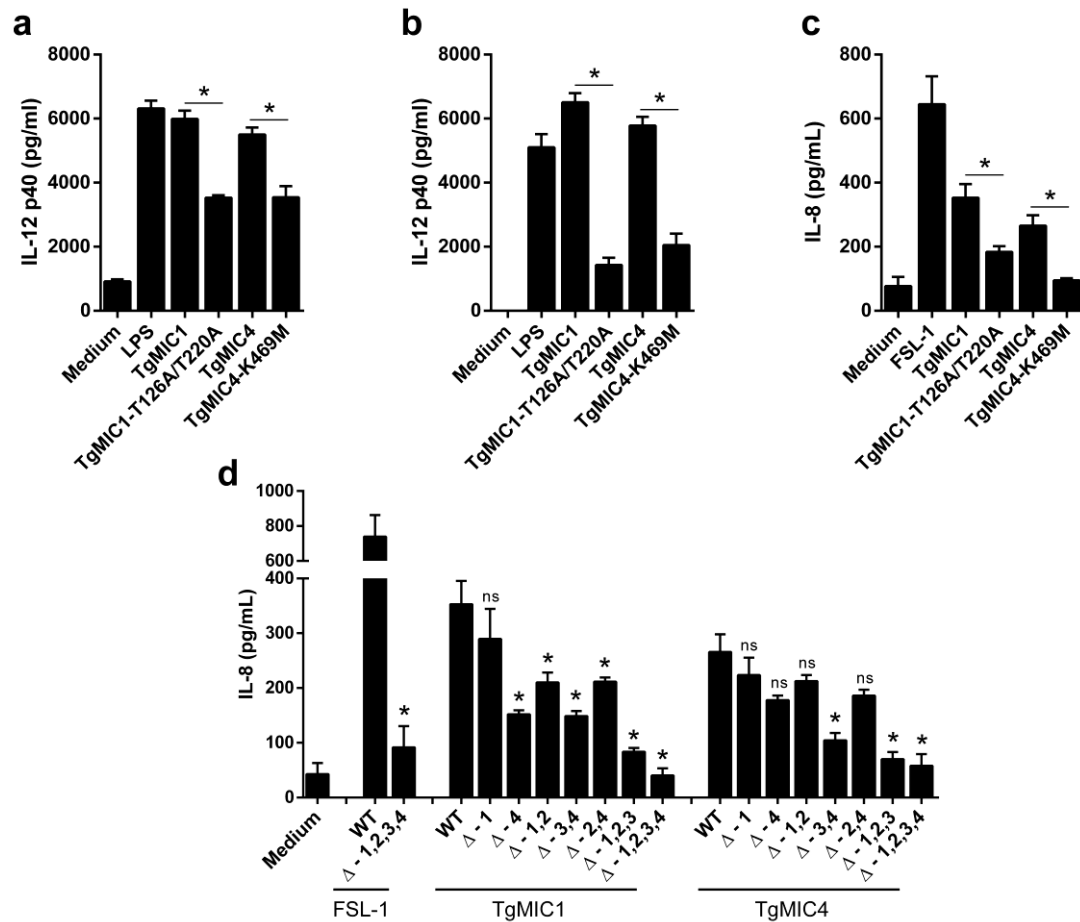

937

938 **Fig 4. The cellular activation induced by TgMICs via TLRs depends on**

939 **carbohydrate recognition. (A)** Bone marrow-derived macrophages and **(B)** bone

940 marrow-derived dendritic cells from C57BL/6 mice and **(C)** transfected HEK293T cells

941 expressing fully glycosylated TLR2 were stimulated with TgMIC1 (WT) and TgMIC4

942 (WT) or with their mutated forms, TgMIC1-T126A/T220A and TgMIC4-K469M, 5

943 μg/mL of each, for 48 h. LPS (100 ng/mL) and FSL-1 (100 ng/mL) were used as

944 positive controls. IL-12p40 and IL-8 levels were measured by ELISA. **(D)** HEK293T

945 cells expressing fully glycosylated TLR2 (with 4 N-glycans, WT) or glycosylation

946 mutants of TLR2 (Δ-1; Δ-4; Δ-1,2; Δ-3,4; Δ-2,4; Δ-1,2,3; Δ-1,2,3,4) were stimulated

947 with TgMIC1 or TgMIC4. FSL-1 (100 ng/mL) was used as positive control. IL-8 levels

948 were measured by ELISA. The statistical analysis compared fully glycosylated TLR2

949 (WT) and TLR2 mutants for the N-glycosylation sites for the same stimuli. Data are  
950 expressed as mean  $\pm$ S.D. of triplicate wells and significance was calculated with  
951 ANOVA. \*P<0.05. Data are representative of three independent experiments.

952

953

954

955

956

957

958

959

960

961

962

963

964

965

966

967

968

969

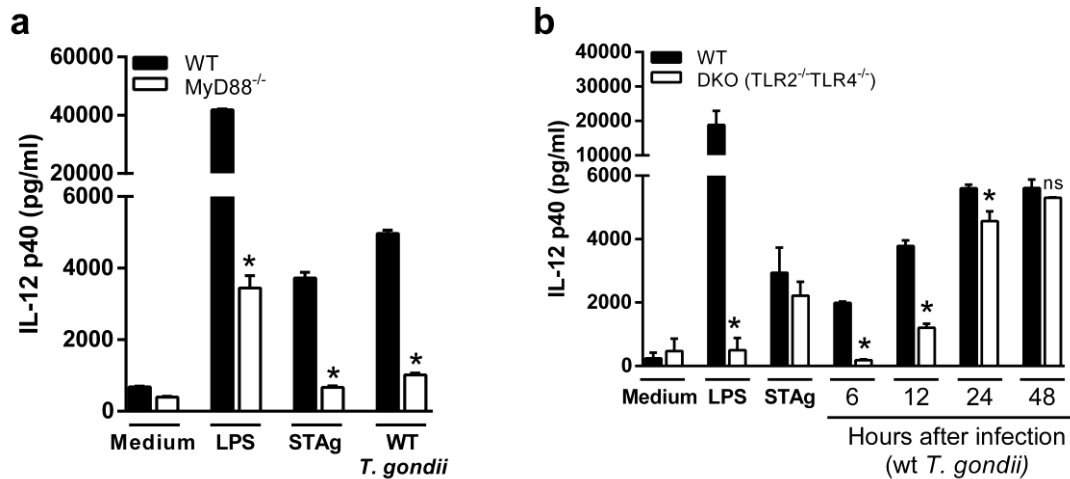

970

971 **Fig 5. Initial production of IL-12 by dendritic cells during *T. gondii* infection**

972 **depends on TLR2 and TLR4.** Bone marrow-derived dendritic cells from WT, (A)

973 MyD88<sup>-/-</sup>, and (B) DKO TLR2<sup>-/-</sup>/TLR4<sup>-/-</sup> mice (C57BL/6 background) were infected

974 with WT *T. gondii* (RH strain, MOI 3). LPS (500 ng/mL) and STAg (10 µg/mL)

975 (soluble *T. gondii* antigen) were used as positive controls. Cell-culture supernatants

976 were collected after 6, 12, 24, and 48 h. IL-12p40 production was analysed by ELISA.

977 Data are expressed as mean ±S.D. of triplicate wells and significance was calculated

978 with ANOVA. \*P<0.05. Data are representative of two (A) and three (B) independent

979 experiments.

980

981

982

983

984

985

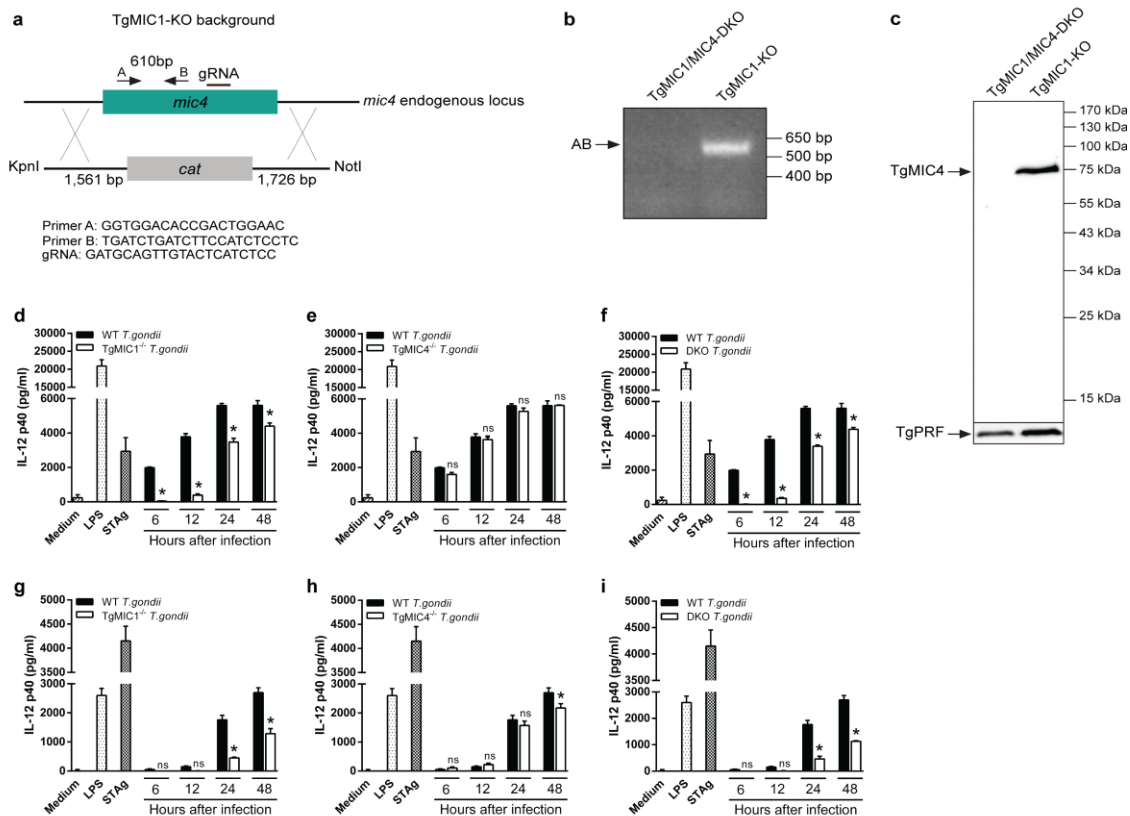

986

987 **Fig 6. TgMIC1 is important for inducing the initial production of IL-12 during *in***  
 988 ***vitro* infection with *T. gondii*.** (A) Schematic representation of chloramphenicol (cat)  
 989 cassette with flanking TgMIC4 regions that was inserted into the endogenous *TgMIC4*  
 990 locus in the recipient TgMIC1-KO strain. (B) Genomic DNA was isolated from both  
 991 strains, and *TgMIC4* gene expression (610 bp from the upstream region) was analysed  
 992 by PCR. (C) Western blot analyses of an equal loading of whole cell lysates  
 993 corresponding to  $5 \times 10^6$  tachyzoites from TgMIC1/TgMIC4-DKO and TgMIC1-KO  
 994 parasites. The membrane was probed with the anti-MIC4 rabbit antibody. (D-F) Bone  
 995 marrow-derived dendritic cells and (G-I) bone marrow-derived macrophages from  
 996 C57BL/6 mice were infected with WT, TgMIC1-KO, TgMIC4-KO, or DKO  
 997 TgMIC1/TgMIC4-dKO *T. gondii* (RH strain, MOI 3:1). LPS (500 ng/mL) and STAg  
 998 (10  $\mu$ g/mL) (soluble *T. gondii* antigen) were used as positive controls. Cell-culture  
 999 supernatants were collected after 6, 12, 24, and 48 h. IL-12 production was analysed by

1000 ELISA. Data are expressed as mean  $\pm$ S.D. of triplicate wells and significance was  
1001 calculated with ANOVA. \*P<0.05. Data in **(D-I)** are representative of three independent  
1002 experiments.
